# Supplementary material for: Health behavior of working-aged Finns predicts self-reported life satisfaction in a population-based 9-years follow-up
Source: Springer Nature journal article supplement (doi:10.1186/s12889-021-11796-4), 2021-10-09
Supplement: MOESM2 [file 19743008]

**Additional file 2**  
**Statistical details**

**Table S1** Non-standardized estimates for linear regression model 2 in which the baseline health behavior sum score predicts subsequent life satisfaction<sup>a</sup> adjusted for sex, age, education and diseases but not for baseline life satisfaction. The Finnish population-based Health and Social Support Study.

|                      |                           | Estimate  | Standard error | p-value |
|----------------------|---------------------------|-----------|----------------|---------|
| Intercept            |                           | 8.65      | 0.16           | < .001  |
| HBSS <sub>2003</sub> |                           | -0.47     | 0.034          | < .001  |
| Sex                  | Male                      | Reference |                |         |
|                      | Female                    | -0.10     | 0.064          | .11     |
| Age (2003)           | 25–29                     | 0.75      | 0.089          | < .001  |
|                      | 35–39                     | 0.86      | 0.087          | < .001  |
|                      | 45–49                     | 0.65      | 0.080          | < .001  |
|                      | 55–59                     | Reference |                |         |
| Education (2003)     | No professional education | 0.32      | 0.092          | .003    |
|                      | Vocational school         | 0.24      | 0.089          | .006    |
|                      | College                   | 0.0020    | 0.083          | .98     |
|                      | University or higher      | Reference |                |         |
| Diseases (2003)      | 0                         | Reference |                |         |
|                      | 1                         | 0.065     | 0.094          | .49     |
|                      | 2 or more                 | 0.79      | 0.083          | < .001  |

<sup>a</sup>LSscore<sub>2012</sub> = Life satisfaction score in 2012, lower scores indicate better life satisfaction

HBSS<sub>2003</sub> = Health behavior sum score i.e.number of protective health behaviors at baseline in 2003

**Table S2** Non-standardized estimates for the linear regression model in which dichotomized baseline dietary habits predicts subsequent life satisfaction<sup>a</sup>. Observed statistical significance level of the covariates. The Finnish population-based Health and Social Support Study.

| Model                                                                                                                   | AIC    | Intercept<br>(p-value) | Dietary<br>habits<br>(p-value) | LSscore <sub>2003</sub> <sup>a</sup><br>(p-value) | Age      | Sex | Education | Diseases |
|-------------------------------------------------------------------------------------------------------------------------|--------|------------------------|--------------------------------|---------------------------------------------------|----------|-----|-----------|----------|
| Model 1: Crude linear model where dietary habits 2003 predicts life satisfaction <sup>a</sup> score 2012, no covariates | 55,330 | 8.05<br>( $< .001$ )   | -0.50<br>( $< .001$ )          | -                                                 | -        | -   | -         | -        |
| Model 2: Model 1 + sex, age, education, diseases as covariates                                                          | 54,631 | 8.08<br>( $< .001$ )   | -0.43<br>( $< .001$ )          | -                                                 | $< .001$ | .63 | $< .001$  | $< .001$ |
| Model 3: Model 2 + LSscore <sub>2003</sub> as a covariate                                                               | 51,873 | 4.29<br>( $< .001$ )   | -0.19<br>( $< .001$ )          | 0.45<br>( $< .001$ )                              | $< .001$ | .62 | .002      | $< .001$ |

<sup>a</sup> LSscore<sub>2012</sub>= Life satisfaction score in 2012; lower score indicates better life satisfaction.

LSscore<sub>2003</sub> = Life satisfaction score at baseline in 2003; lower scores indicate better life satisfaction

**Table S3** Non-standardized estimates for the linear regression model in which a dichotomized baseline smoking status predicts subsequent life satisfaction<sup>a</sup>. Observed statistical significance level of the covariates. The Finnish population-based Health and Social Support Study.

| Model                                                                                                                   | AIC    | Intercept<br>(p-value) | Smoking<br>status<br>(p-value) | LSscore <sub>2003</sub> <sup>a</sup><br>(p-value) | Age      | Sex | Education | Diseases |
|-------------------------------------------------------------------------------------------------------------------------|--------|------------------------|--------------------------------|---------------------------------------------------|----------|-----|-----------|----------|
| Model 1: Crude linear model where smoking status 2003 predicts life satisfaction <sup>a</sup> score 2012, no covariates | 55,256 | 8.18<br>( $< .001$ )   | -0.91<br>( $< .001$ )          | -                                                 | -        | -   | -         | -        |
| Model 2: Model 1 + sex, age, education, diseases as covariates                                                          | 54,583 | 8.17<br>( $< .001$ )   | -0.75<br>( $< .001$ )          | -                                                 | $< .001$ | .87 | $< .001$  | $< .001$ |
| Model 3: Model 2 + LSscore <sub>2003</sub> as a covariate                                                               | 51,855 | 4.34<br>( $< .001$ )   | -0.38<br>( $< .001$ )          | 0.45<br>( $< .001$ )                              | $< .001$ | .83 | .007      | $< .001$ |

<sup>a</sup> LSscore<sub>2012</sub>= Life satisfaction score in 2012; lower score indicates better life satisfaction.

LSscore<sub>2003</sub> = Life satisfaction score at baseline in 2003; lower scores indicate better life satisfaction

**Table S4** Non-standardized estimates for the linear regression model in which dichotomized baseline alcohol consumption predicts subsequent life satisfaction<sup>a</sup>. Observed statistical significance level of the covariates. The Finnish population-based Health and Social Support Study.

| Model                                                                                                                        | AIC    | Intercept            | Alcohol consumption (p-value) | LSscore <sub>2003</sub> <sup>a</sup> (p-value) | Age      | Sex | Education | Diseases |
|------------------------------------------------------------------------------------------------------------------------------|--------|----------------------|-------------------------------|------------------------------------------------|----------|-----|-----------|----------|
| Model 1: Crude linear model where alcohol consumption 2003 predicts life satisfaction <sup>a</sup> score 2012, no covariates | 55,320 | 8.29<br>( $< .001$ ) | -1.17<br>( $< .001$ )         | -                                              | -        | -   | -         | -        |
| Model 2: Model 1 + sex, age, education, diseases as covariates                                                               | 54,609 | 8.25<br>( $< .001$ ) | -1.11<br>( $< .001$ )         | -                                              | $< .001$ | .94 | $< .001$  | $< .001$ |
| Model 3: Model 2 + LSscore <sub>2003</sub> as a covariate                                                                    | 51,858 | 4.38<br>( $< .001$ ) | -0.62<br>( $< .001$ )         | 0.45<br>( $< .001$ )                           | $< .001$ | .76 | $< .001$  | $< .001$ |

<sup>a</sup>LSscore<sub>2012</sub>= Life satisfaction score in 2012; lower score indicates better life satisfaction.

LSscore<sub>2003</sub> = Life satisfaction score at baseline in 2003; lower scores indicate better life satisfaction

**Table S5** Non-standardized estimates for the linear regression model in which dichotomized baseline physical activity predicts subsequent life satisfaction<sup>a</sup>. Observed statistical significance level of the covariates. The Finnish population-based Health and Social Support Study.

| Model                                                                                                                      | AIC    | Intercept            | Physical activity (p-value) | LSscore <sub>2003</sub> <sup>a</sup> (p-value) | Age      | Sex | Education | Diseases |
|----------------------------------------------------------------------------------------------------------------------------|--------|----------------------|-----------------------------|------------------------------------------------|----------|-----|-----------|----------|
| Model 1: Crude linear model where physical activity 2003 predicts life satisfaction <sup>a</sup> score 2012, no covariates | 55,343 | 8.22<br>( $< .001$ ) | -0.49<br>( $< .001$ )       | -                                              | -        | -   | -         | -        |
| Model 2: Model 1 + sex, age, education, diseases as covariates                                                             | 54,626 | 8.15<br>( $< .001$ ) | -0.48<br>( $< .001$ )       | -                                              | $< .001$ | .71 | $< .001$  | $< .001$ |
| Model 3: Model 2 + LSscore <sub>2003</sub> as a covariate                                                                  | 51,867 | 4.31<br>( $< .001$ ) | -0.26<br>( $< .001$ )       | 0.45<br>( $< .001$ )                           | $< .001$ | .91 | $< .001$  | $< .001$ |

<sup>a</sup>LSscore<sub>2012</sub>= Life satisfaction score in 2012; lower score indicates better life satisfaction.

LSscore<sub>2003</sub> = Life satisfaction score at baseline in 2003; lower scores indicate better life satisfaction

**Table S6** Number of major diseases reported by the participants  
The Finnish population-based Health and Social Support Study.

| Number of Diseases | Frequency | Percentage |
|--------------------|-----------|------------|
| 0                  | 2136      | 18.01      |
| 1                  | 2768      | 23.34      |
| 2                  | 2399      | 20.23      |
| 3                  | 1720      | 14.51      |
| 4                  | 1170      | 9.87       |
| 5                  | 634       | 5.35       |
| 6                  | 428       | 3.61       |
| 7                  | 230       | 1.94       |
| 8                  | 150       | 1.27       |
| 9                  | 93        | 0.78       |
| 10 or more         | 129       | 1.09       |

**Table S7** Number of participants reporting specific diseases.  
The Finnish population-based Health and Social Support Study.

| Number of Diseases                                                 | Frequency | Percentage |
|--------------------------------------------------------------------|-----------|------------|
| Long-term bronchitis or bronchiectasis                             | 1065      | 9.1        |
| Lung asthma                                                        | 794       | 6.8        |
| Allergic rhinitis e.g. hay fever                                   | 3517      | 29.9       |
| High blood pressure                                                | 3834      | 32.5       |
| Hypertension                                                       | 1126      | 9.6        |
| High cholesterol                                                   | 2917      | 24.7       |
| Diabetes                                                           | 381       | 3.2        |
| Myocardial infarction or coronary thrombosis                       | 134       | 1.1        |
| Angina pectoris, i.e. chest pain caused by coronary artery disease | 232       | 2.0        |
| Atrial fibrillation or atrial flutter                              | 268       | 2.3        |
| Stroke                                                             | 76        | 0.7        |
| Other cerebrovascular accident                                     | 251       | 2.1        |
| Peptic ulcer                                                       | 724       | 6.2        |
| Celiac disease                                                     | 179       | 1.5        |
| Liver disease                                                      | 179       | 1.5        |
| Kidney disease                                                     | 249       | 2.1        |
| Rheumatoid arthritis                                               | 275       | 2.3        |
| Arthrosis                                                          | 1499      | 12.8       |
| Sciatica                                                           | 2183      | 18.6       |
| Fibromyalgia                                                       | 320       | 2.7        |
| Cataract or glaucoma                                               | 280       | 2.4        |
| Migraine                                                           | 2514      | 21.3       |
| Epilepsy                                                           | 162       | 1.4        |
| Brain injury                                                       | 123       | 1.1        |
| Meningitis or encephalitis                                         | 252       | 2.1        |
| Other cerebral disease of neurological disease                     | 274       | 2.3        |
| Depression                                                         | 1692      | 14.4       |
| Panic disorder                                                     | 731       | 6.2        |
| Eating disorder                                                    | 205       | 1.7        |
| Other mental disorder                                              | 436       | 3.7        |
| Malignant tumor                                                    | 342       | 2.9        |
| Other chronic or severe disease, which?                            | 1618      | 14.1       |
